# Supplementary material for: Powerful Inference with the D-Statistic on Low-Coverage Whole-Genome Data
Source: PubMed Central journal article supplement (PMC5919751; doi:10.1534/g3.117.300192), 2017-12-01

## Supplemental Material.

The Supplemental Material contains two tables with numeric results related to a real data scenario, and five figures regarding the power of the method, the asymptotic behaviour of  $D_{ext}$ , the estimates of type-specific errors, the behaviour of the D-statistic and the correction for external introgression.

**Table S1. European Introgression into Native American Individuals.** The table contains the values of the different types of D-statistics used to create the plot of Figure 4C, reporting the D-statistic for the tree (((PEL,CHB)CEU)YRI). The first column denote if we are illustrating either the extended D-statistic,  $D_{ext}$ , or the D-statistic that uses a sampled base,  $D_{1base}$ . The column denoted by D is the D-statistic over all blocks of loci, used to estimate the standard deviation (third column) by bootstrapping. The Z-score represents the D-statistic normalized by its standard deviation. The last column represents the ratio between the estimated standard deviations of  $D_{1base}$  and  $D_{ext}$ .

| D-statistic | D         | stdev(D) | Z-score    | $\frac{\sigma_{1base}}{\sigma_{ext}}$ |
|-------------|-----------|----------|------------|---------------------------------------|
| $D_{ext}$   | -0.032638 | 0.002449 | -13.114101 | -                                     |
| $D_{1base}$ | -0.038171 | 0.006164 | -6.223641  | 2.51                                  |
| $D_{1base}$ | -0.032786 | 0.006244 | -5.253267  | 2.54                                  |
| $D_{1base}$ | -0.030950 | 0.006708 | -4.602315  | 2.74                                  |
| $D_{1base}$ | -0.038730 | 0.006480 | -5.999972  | 2.64                                  |
| $D_{1base}$ | -0.033640 | 0.006244 | -5.353646  | 2.55                                  |

**Table S2. Estimated Error Rates.** Estimated type-specific error rates for the ancient individuals Saqqaq and Canadian Dorset Mi'kmaq used in the tree of Figure 3B.

| Individual | $A \rightarrow C$ | $A \rightarrow G$ | $A \rightarrow T$ | $C \rightarrow A$ | $C \rightarrow G$ | $C \rightarrow T$ |
|------------|-------------------|-------------------|-------------------|-------------------|-------------------|-------------------|
| Saqqaq     | 1.90e-04          | 6.08e-04          | 3.27e-04          | 7.52e-04          | 1.22e-04          | 6.32e-04          |
| Dorset     | 8.86e-05          | 1.15e-03          | 1.62e-04          | 2.04e-04          | 8.52e-05          | 5.22e-03          |
|            | $G \rightarrow A$ | $G \rightarrow C$ | $G \rightarrow T$ | $T \rightarrow A$ | $T \rightarrow C$ | $T \rightarrow G$ |
| Saqqaq     | 6.35e-04          | 1.26e-04          | 7.52e-04          | 3.28e-04          | 6.08e-04          | 1.91e-04          |
| Dorset     | 5.21e-03          | 9.01e-05          | 2.06e-04          | 1.64e-04          | 1.15e-03          | 9.04e-05          |

**Table S3. Extended D-Statistic in Real Data Scenario with Ancient Genomes.** Table comparing the extended D-statistic with the application of error correction and/or transition removal for the tree of Figure 5B, where the ancient individuals Saqqaq and Canadian Dorset Mi'kmaq are affected by high type-specific error rates.

| Correction        | $D_{ext}$ | $sd(D_{ext})$ | Z - score | p - value |
|-------------------|-----------|---------------|-----------|-----------|
| None              | -5.26e-2  | 5.4e-3        | -9.81     | 0         |
| Trans.Rem.        | 1.01e-2   | 7.1e-3        | 1.41      | 1.57e-1   |
| Error.Corr.       | 5.64e-3   | 6.1e-3        | 0.93      | 3.51e-1   |
| Err.Corr & Tr.Rem | 8.77e-4   | 7.3e-3        | 0.12      | 9.04e-1   |

**Figure S1. Effect of the number of individuals per population in detecting admixture.** Results from the simulation of the scenario of Figure 2A, subject to a migration from  $H_3$  to  $H_1$ , using either 1, 2, 5, 10 or 20 individuals per population sequenced at depth 0.2X. (A) Power of the extended D-statistic for increasing values of the number of individuals per group. (B) The value of the standard deviation of  $D_{ext}$  for different number of individuals per population.

**Power and standard deviation of the extended D-statistic for varying number of individuals per group. Depth of simulated data 0.2X**

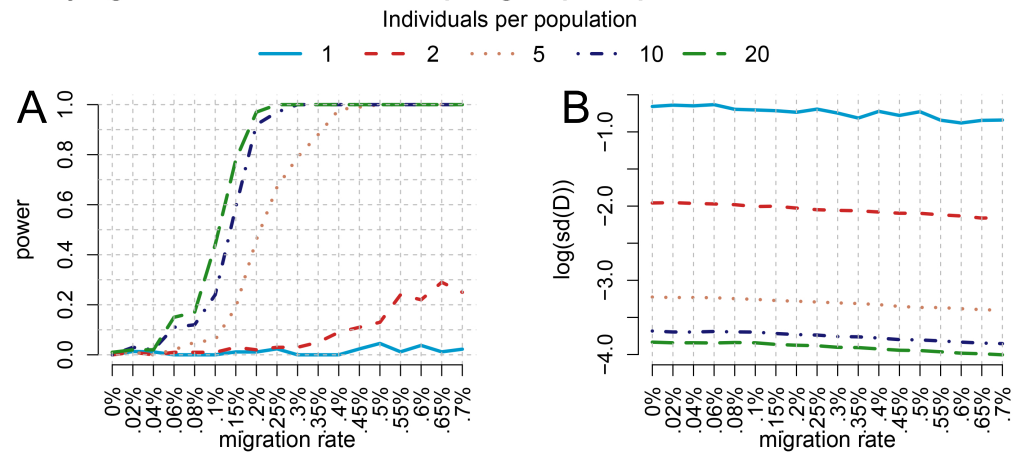

**Figure S2. Asymptotic convergence of the extended D-statistic.** QQ-plot of the observed log-p-values from 5000 simulations of the null hypothesis of Figure 2B, where we have used 5 individuals per population and depth 2X. Each individual has 200 regions of length 5Mb. Despite that, the extended D-statistic  $D_{ext}$  shows already good properties of asymptotic convergence to the standard normal, with a slight problem due to few extreme p-values.

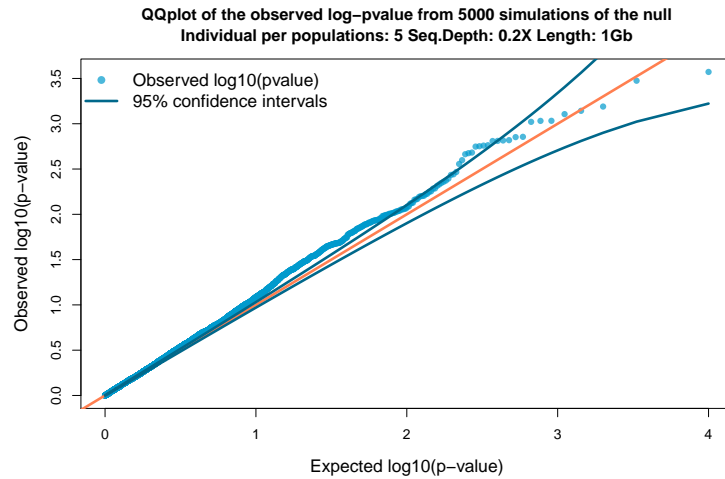

**Figure S3. Subtrees of interest in a scenario subject to external introgression.** (A) Case of a 4-population tree subject to introgression from an external population  $H_5$ . Consider  $H_2$  being the population subject to introgression from  $H_5$ . (B) The subtree  $T_{1:4}$  includes the 4-population tree excluding the admixing population. (C) The subtree  $T_{out}$  replaces the admixed population with the population source of introgression. (D) The subtree  $T_{un}$ , where  $H'_2$  represents  $H_2$  when it has not yet undergone admixture, reflects the null hypothesis of correctness for the genetic relationship between four populations.

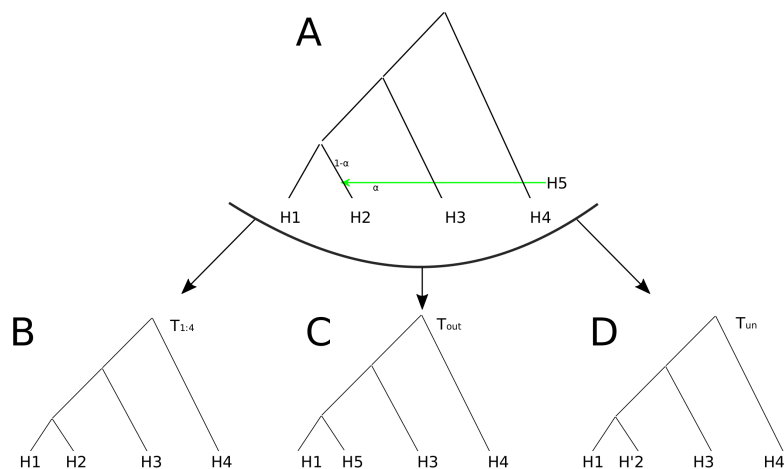

**Figure S4. Estimates of Type-Specific Errors for Ancient Genomes.**

Estimated type-specific error rates for the Saqqaq, Mi'qmaq and French genomes of the real data scenario illustrated in Fig 4B.

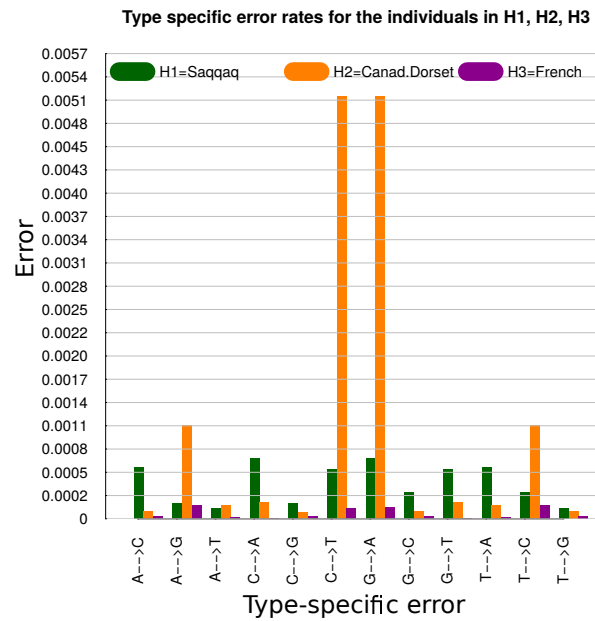

**Figure S5. Behaviour of the D-Statistic in Function of the Type-Specific Error.** Effect of increasing and decreasing the removal of error for the base transitions  $C \rightarrow G$  and  $C \rightarrow T$  for one of the Greenlandic Saqqaq, Canadian Dorset and French genomes. This corresponds to the addition of a value in the entry  $e(G, C)$  or  $e(T, C)$  of the estimated error matrix of one of the individuals, as if the estimated error rate was higher or lower. In solid lines are represented the values of  $D_{ext}$  for which the correction is performed. The dashed lines represent the analogous values where ancient transitions are not considered.

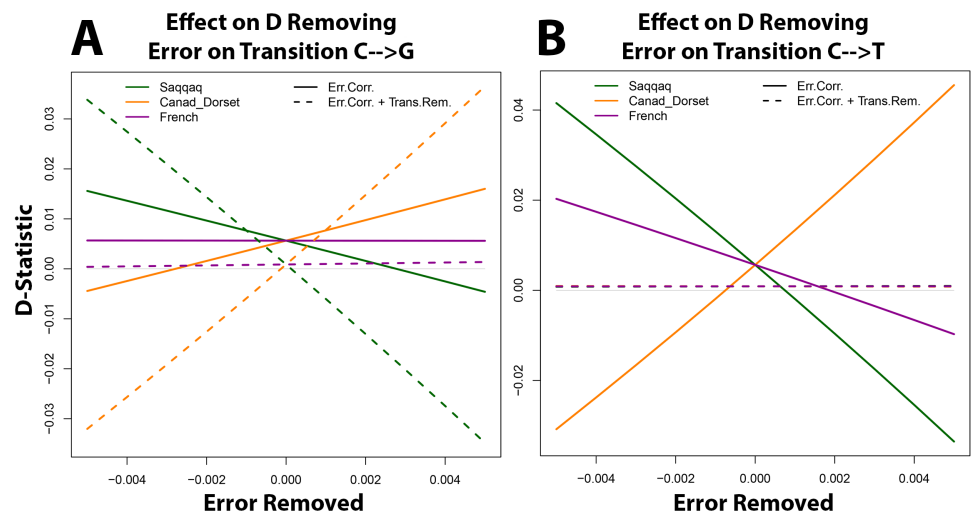

Supplement: 551FileS1.pdf [file 551FileS1.pdf]
